# Supplementary material for: A Noninvasive Genetic Insight into the Spatial and Social Organization of an Endangered Population of the Eurasian Otter (Lutra lutra, Mustelidae, Carnivora)
Source: MDPI journal article supplement (doi:10.3390/su14041943), 2022-02-09
Supplement: s1 [file s1]

**Table S1.** Details on dyads that were detected at the same site at least once (F = full-sibs, H = half-sibs, U = unrelated; 1 = male-female couple, 2 = mal-male couple, 3 = female-female couple). Full-sibs are defined as progenies having the same male and female parents, while half-sibs are progenies having only one parent in common.

| Overlap | Sibship | Couple | Categsex |
|---------|---------|--------|----------|
| 0       | U       | F1F6   | 3        |
| 0       | U       | F2F3   | 3        |
| 0       | H       | F2F4   | 3        |
| 0       | U       | F2F5   | 3        |
| 0       | U       | F2F6   | 3        |
| 0       | U       | M1F1   | 1        |
| 0       | U       | M1F3   | 1        |
| 0       | H       | M1F4   | 1        |
| 0       | U       | M1F5   | 1        |
| 0       | U       | M1F6   | 1        |
| 0       | U       | M1M8   | 2        |
| 0       | U       | M2F1   | 1        |
| 0       | U       | M2F3   | 1        |
| 0       | H       | M2F4   | 1        |
| 0       | U       | M2F5   | 1        |
| 0       | U       | M2F6   | 1        |
| 0       | U       | M4F1   | 1        |
| 0       | U       | M4F3   | 1        |
| 0       | U       | M4F4   | 1        |
| 0       | H       | M4F5   | 1        |
| 0       | H       | M4F6   | 1        |
| 0       | U       | M8F1   | 1        |
| 0       | U       | M8F2   | 1        |
| 0       | U       | M8F3   | 1        |
| 0       | U       | M8F4   | 1        |
| 0       | H       | M8F5   | 1        |
| 0       | H       | M8F6   | 1        |
| 0       | U       | F1F2   | 3        |
| 1550    | F       | M3M8   | 2        |
| 1849    | U       | F3F6   | 3        |

|       |   |      |   |
|-------|---|------|---|
| 2453  | U | F1F5 | 3 |
| 3207  | H | F4F6 | 3 |
| 3398  | U | F3F5 | 3 |
| 3625  | U | F1F3 | 3 |
| 3732  | F | M1M2 | 2 |
| 3732  | U | M1M4 | 2 |
| 3856  | U | M3F1 | 1 |
| 4330  | U | F3F4 | 3 |
| 4570  | U | M3F3 | 1 |
| 4759  | U | F4F5 | 3 |
| 5451  | H | F5F6 | 3 |
| 5691  | U | F1F4 | 3 |
| 5691  | U | M3F4 | 1 |
| 5712  | F | M2F2 | 1 |
| 5712  | U | M2F2 | 1 |
| 5712  | U | M4F2 | 1 |
| 7000  | H | M3F5 | 1 |
| 7000  | H | M3F6 | 1 |
| 7518  | F | M1F2 | 1 |
| 7518  | U | M1M3 | 2 |
| 11299 | U | M2M3 | 2 |
| 11299 | F | M3M4 | 2 |
| 11854 | U | M3F2 | 1 |
| 20123 | F | M4M8 | 2 |
| 20173 | U | M2M8 | 2 |
| 29872 | U | M2M4 | 2 |
